# Supplementary material
Source: PubMed Central journal article supplement (PMC4595932)
Supplement: NIHMS700876-supplement-1.pdf [file NIHMS700876-supplement-1.pdf]

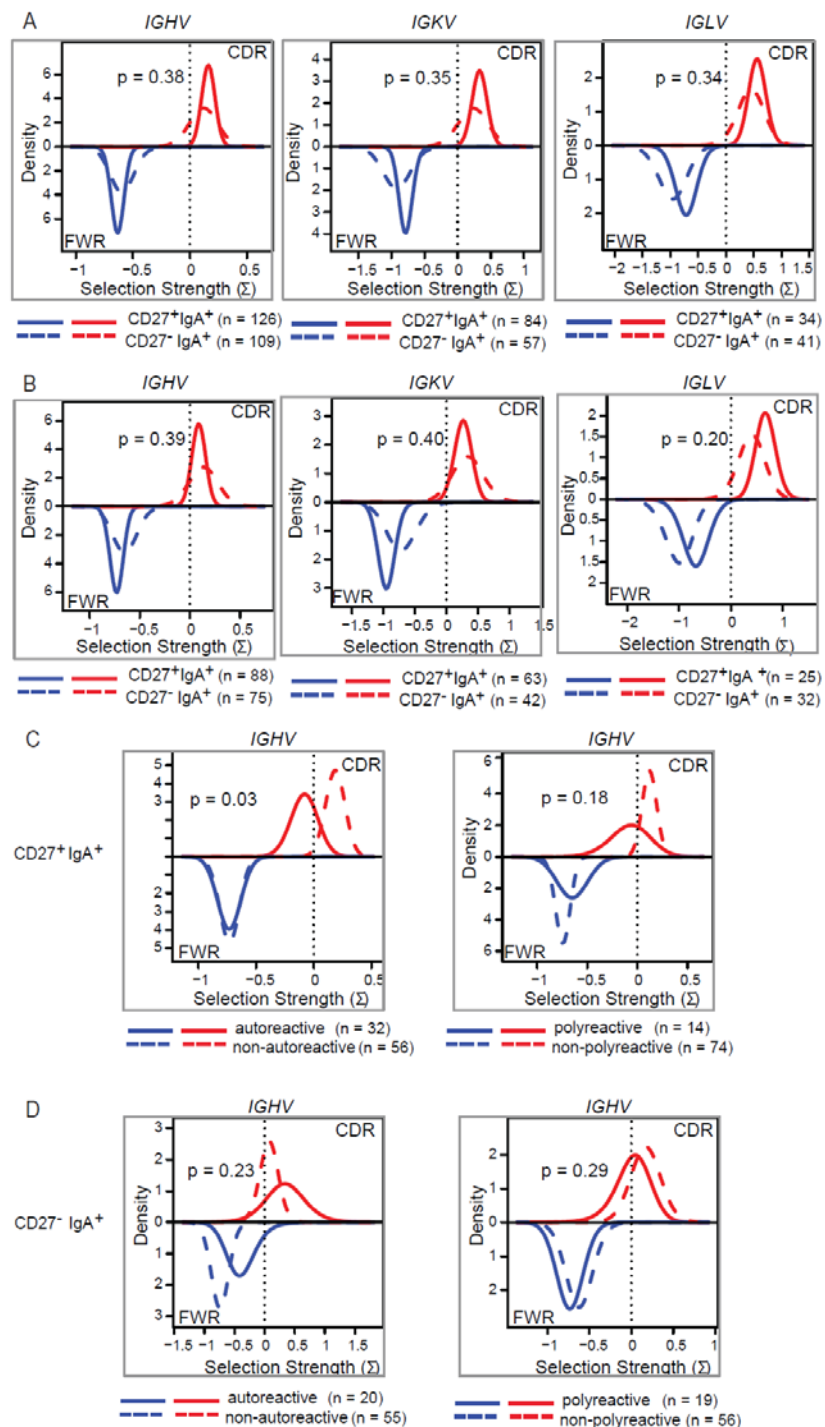

**SUPPLEMENTAL FIGURE 1.** Selection for replacement mutations. **(A)** Selection strengths in amplified rearrangements, and **(B)** selection strengths in cloned rearrangements as determined with the Bayesian estimation of Antigen-driven SElectIoN program (<https://selection.med.yale.edu/baseline>) (32). **(C)** Selection strengths in autoreactive (left panel) and polyreactive (right panel) antibodies derived from CD27<sup>+</sup>IgA<sup>+</sup> B cells. **(D)** Selection strengths in autoreactive (left panel) and polyreactive (right panel) antibodies derived from CD27<sup>-</sup>IgA<sup>+</sup> B cells. In all panels, red lines represent CDRs, blue lines represent FRs.

**SUPPLEMENTAL TABLE I.** Expression levels of selected genes in naive and memory-B-cell subsets.

|                       | Gene symbol       | Probe set   | trans.    | pre-naive | mat. naive | natural effector | IgM-only | CD27+ IgG+ | CD27+ IgA+ | CD27- IgG+ | CD27- IgA+ | fold change  |              |               |
|-----------------------|-------------------|-------------|-----------|-----------|------------|------------------|----------|------------|------------|------------|------------|--------------|--------------|---------------|
|                       |                   |             |           |           |            |                  |          |            |            |            |            | CD27-IgA+    | CD27-IgA+    | CD27-IgA+     |
|                       |                   |             |           |           |            |                  |          |            |            |            |            | vs CD27+IgA+ | vs CD27-IgG+ | vs naive mat. |
| pan B                 | CD19              | 206398_s_at | 1356.9    | 1521.8    | 1912.9     | 930.6            | 774.1    | 1226.8     | 1360.2     | 1272.3     | 1131.0     | -1.2         | -1.1         | -1.7          |
|                       | MS4A1 (CD20)      | 228592_at   | 5809.8    | 4802.1    | 6516.7     | 4603.6           | 4550.8   | 10107.4    | 10008.6    | 9587.5     | 7915.4     | -1.3         | -1.2         | 1.2           |
|                       | CR2 (CD21)        | 205544_s_at | 101.20    | 76.64     | 105.0      | 50.5             | 66.5     | 82.0       | 117.9      | 79.6       | 88.9       | -1.3         | 1.1          | -1.2          |
|                       | CD40              | 35150_at    | 203.0     | 212.3     | 265.1      | 206.5            | 184.2    | 213.5      | 207.4      | 220.1      | 176.6      | -1.2         | -1.2         | -1.5          |
|                       | CD79A             | 205049_s_at | 1889.1    | 2318.7    | 1878.6     | 1676.8           | 1577.1   | 897.7      | 929.1      | 1104.9     | 795.1      | -1.2         | -1.4         | -2.4          |
|                       | CD79B             | 205297_s_at | 2062.18   | 1520.96   | 1458.40    | 1161.46          | 862.22   | 722.05     | 745.00     | 1066.61    | 961.20     | 1.3          | -1.1         | -1.5          |
|                       | CD81              | 200675_at   | 1990.3    | 1391.2    | 1272.1     | 1513.4           | 1340.4   | 1381.0     | 1304.0     | 1560.8     | 1167.5     | -1.1         | -1.3         | -1.1          |
|                       | TNFRSF13C (BAFFR) | 1552892_at  | 239.8     | 276.8     | 336.4      | 298.8            | 327.7    | 255.4      | 235.6      | 331.0      | 288.6      | 1.2          | -1.1         | -1.2          |
|                       | B cell subset     | CD5         | 230489_at | 133.0     | 100.2      | 35.7             | 51.0     | 51.2       | 37.6       | 32.8       | 37.5       | 36.9         | 1.1          | 1.0           |
| CD38                  |                   | 205692_s_at | 150.3     | 77.2      | 42.0       | 39.6             | 40.5     | 29.5       | 39.3       | 41.4       | 36.8       | -1.1         | -1.1         | -1.1          |
| IGHM                  |                   | 212827_at   | 9930.3    | 9629.5    | 10453.4    | 7616.8           | 6668.8   | 550.6      | 488.7      | 863.4      | 657.7      | 1.3          | -1.3         | <b>-15.9</b>  |
| IGHD                  |                   | 213674_x_at | 4212.8    | 4559.7    | 4419.2     | 2340.6           | 541.2    | 57.3       | 72.5       | 144.5      | 93.2       | 1.3          | -1.5         | <b>-47.5</b>  |
| IGHA                  |                   | 217022_s_at | 57.2      | 51.0      | 93.1       | 554.7            | 865.2    | 1922.5     | 6175.6     | 917.5      | 4632.9     | -1.3         | <b>5.0</b>   | <b>49.8</b>   |
| IGHG                  |                   | 211430_s_at | 79.5      | 197.3     | 397.3      | 1008.3           | 902.0    | 3356.3     | 1011.4     | 3791.6     | 841.0      | -1.2         | <b>-4.5</b>  | <b>2.1</b>    |
| IGKC                  |                   | 205544_s_at | 14485.2   | 13709.4   | 13117.2    | 14284.0          | 13377.4  | 12043.9    | 12019.7    | 11990.8    | 9414.2     | -1.3         | -1.3         | -1.4          |
| IGLC                  |                   | 209139_s_at | 318.4     | 263.1     | 329.0      | 445.8            | 501.7    | 542.6      | 527.4      | 473.3      | 414.0      | -1.3         | -1.1         | 1.3           |
| CD23                  |                   | 206760_s_at | 383.2     | 738.4     | 721.6      | 164.1            | 100.1    | 90.5       | 94.7       | 139.8      | 81.3       | -1.2         | -1.7         | <b>-8.9</b>   |
| activation/<br>memory | CD27              | 206150_at   | 49.0      | 53.8      | 47.6       | 425.9            | 368.8    | 363.8      | 344.9      | 107.1      | 128.6      | <b>-2.7</b>  | 1.2          | <b>2.7</b>    |
|                       | CD80              | 207176_s_at | 32.8      | 42.9      | 31.7       | 64.6             | 66.3     | 133.3      | 97.8       | 104.8      | 81.9       | -1.2         | -1.3         | <b>2.6</b>    |
|                       | CD86              | 210895_s_at | 166.5     | 105.0     | 171.2      | 334.3            | 276.6    | 442.7      | 359.7      | 357.2      | 365.5      | 1.0          | 1.0          | 2.1           |
|                       | CD180             | 206206_at   | 224.6     | 221.8     | 199.7      | 291.6            | 236.1    | 176.5      | 184.4      | 203.3      | 177.1      | 1.0          | -1.1         | -1.1          |
|                       | FAS               | 204781_s_at | 31.0      | 24.7      | 36.9       | 91.3             | 119.8    | 268.0      | 186.8      | 149.8      | 314.9      | <b>1.7</b>   | <b>2.1</b>   | <b>8.5</b>    |
|                       | TNFRSF13B (TAC1)  | 207641_at   | 72.3      | 58.9      | 70.4       | 194.9            | 177.1    | 214.6      | 187.2      | 138.1      | 207.9      | 1.1          | <b>1.5</b>   | 3.0           |
|                       | CD58              | 205173_x_at | 21.8      | 26.4      | 31.9       | 93.5             | 105.8    | 148.8      | 136.4      | 126.5      | 198.3      | 1.5          | 1.6          | <b>6.2</b>    |
| BCR-<br>signaling     | DAPP1 (BAM32)     | 222858_s_at | 562.9     | 427.0     | 550.6      | 657.6            | 467.8    | 642.3      | 598.6      | 600.1      | 461.7      | -1.3         | -1.3         | -1.2          |
|                       | PIK3AP1 (BCAP)    | 226459_at   | 778.9     | 700.1     | 925.0      | 789.9            | 789.0    | 1053.7     | 1045.3     | 1039.3     | 988.2      | -1.1         | -1.1         | 1.1           |
|                       | BCL10             | 205263_at   | 1263.2    | 859.6     | 603.7      | 893.6            | 644.9    | 592.2      | 580.0      | 725.3      | 711.8      | 1.2          | 1.0          | 1.2           |
|                       | BLNK              | 207655_s_at | 939.1     | 737.0     | 931.8      | 671.5            | 645.0    | 967.9      | 1141.1     | 926.8      | 819.2      | -1.4         | -1.1         | -1.1          |
|                       | BTK               | 205504_at   | 582.1     | 484.4     | 496.4      | 379.0            | 360.1    | 453.9      | 435.1      | 406.5      | 414.9      | 1.0          | 1.0          | -1.2          |
|                       | CARD11            | 223514_at   | 485.5     | 399.6     | 626.8      | 557.8            | 742.8    | 631.0      | 616.8      | 525.5      | 576.5      | -1.1         | 1.1          | -1.1          |
|                       | CDC42             | 206398_s_at | 1400.4    | 1112.6    | 1105.6     | 1497.4           | 1410.4   | 1309.0     | 1223.8     | 1455.6     | 1658.2     | <b>1.4</b>   | 1.1          | 1.5           |
|                       | GAB1              | 212587_s_at | 96.8      | 46.7      | 28.0       | 24.6             | 26.3     | 17.5       | 22.4       | 14.3       | 18.6       | -1.2         | 1.3          | 1.5           |
|                       | GAB2              | 205049_s_at | 324.7     | 145.7     | 112.0      | 275.2            | 447.5    | 257.0      | 258.9      | 208.6      | 316.9      | 1.2          | 1.5          | <b>2.8</b>    |
|                       | GRB2              | 205297_s_at | 1719.1    | 1295.9    | 1387.7     | 2523.6           | 2707.2   | 1628.3     | 1802.4     | 1800.8     | 1915.1     | 1.1          | 1.1          | <b>1.4</b>    |
|                       | LYN               | 208728_s_at | 4985.1    | 3770.2    | 4259.0     | 3704.4           | 4436.6   | 2642.6     | 2763.1     | 3345.5     | 2872.1     | 1.0          | -1.2         | <b>-1.5</b>   |
|                       | MALT1             | 202723_s_at | 339.4     | 282.0     | 367.4      | 445.5            | 399.6    | 326.9      | 300.7      | 361.4      | 334.7      | 1.1          | -1.1         | -1.1          |
|                       | PTEN              | 1557030_at  | 1127.4    | 972.0     | 916.9      | 1226.0           | 1035.6   | 930.4      | 1012.9     | 914.4      | 1044.0     | 1.0          | 1.1          | 1.1           |

|                                 |                 |              |        |        |        |        |        |        |        |        |        |            |             |             |
|---------------------------------|-----------------|--------------|--------|--------|--------|--------|--------|--------|--------|--------|--------|------------|-------------|-------------|
|                                 | RAC1            | 203853_s_at  | 1625.5 | 1499.3 | 1586.7 | 1665.3 | 1570.5 | 1122.7 | 1283.1 | 1424.1 | 1374.4 | 1.1        | 1.0         | -1.2        |
|                                 | PTPN6 (SHP1)    | 223049_at    | 598.3  | 911.9  | 667.6  | 464.7  | 479.2  | 735.3  | 626.3  | 675.0  | 581.9  | -1.1       | -1.2        | -1.1        |
|                                 | PTPN11 (SHP2)   | 202626_s_at  | 404.4  | 333.1  | 374.2  | 426.9  | 468.5  | 435.6  | 443.5  | 529.9  | 523.0  | 1.2        | 1.0         | 1.4         |
|                                 | SYK             | 208309_s_at  | 1262.5 | 1005.2 | 1091.8 | 1836.2 | 1384.4 | 900.9  | 1062.1 | 877.5  | 746.8  | -1.4       | -1.2        | -1.5        |
|                                 | INPP5D (SHIP1)  | 225363_at    | 714.8  | 600.7  | 876.8  | 625.9  | 826.9  | 1001.4 | 1088.0 | 942.7  | 907.8  | -1.2       | 1.0         | 1.0         |
| BCR-<br>signaling<br>inhibition | CD22            | 38521_at     | 921.1  | 1123.1 | 1365.1 | 568.0  | 560.4  | 516.5  | 570.8  | 620.0  | 591.6  | 1.0        | 1.0         | <b>-2.3</b> |
|                                 | CD72            | 215925_s_at  | 602.7  | 463.9  | 469.0  | 238.6  | 140.9  | 71.5   | 159.3  | 177.8  | 172.7  | 1.1        | 1.0         | <b>-2.7</b> |
|                                 | PTPRC (CD45)    | 212587_s_at  | 2878.7 | 2230.4 | 4002.0 | 3616.1 | 3147.2 | 3686.9 | 3588.3 | 2899.2 | 2431.0 | -1.5       | -1.2        | -1.6        |
|                                 | SIGLEC10        | 1552807_a_at | 335.7  | 216.6  | 272.8  | 545.0  | 495.2  | 382.7  | 394.5  | 424.1  | 450.3  | 1.1        | 1.1         | 1.6         |
|                                 | FCGRB           | 210889_s_at  | 377.2  | 384.1  | 490.8  | 544.2  | 493.6  | 384.1  | 449.2  | 431.7  | 513.3  | 1.1        | 1.2         | 1.0         |
|                                 | PDCD1           | 207634_at    | 52.7   | 67.1   | 61.2   | 60.3   | 57.4   | 53.6   | 52.1   | 55.3   | 58.7   | 1.1        | 1.1         | 1.0         |
|                                 | CEACAM1 (CD66A) | 211881_x_at  | 316.4  | 343.5  | 382.1  | 248.7  | 179.0  | 131.8  | 129.8  | 172.6  | 129.5  | 1.0        | -1.3        | <b>-3.0</b> |
|                                 | LAIR1           | 210644_s_at  | 124.6  | 160.5  | 120.6  | 68.6   | 45.1   | 61.2   | 66.9   | 81.0   | 46.9   | -1.4       | -1.7        | <b>-2.6</b> |
|                                 | LILRB3 (PIRB)   | 210225_x_at  | 61.7   | 65.5   | 68.4   | 76.8   | 62.5   | 56.8   | 64.9   | 69.6   | 77.3   | 1.2        | 1.1         | 1.1         |
|                                 | LILRB1 (ILT2)   | 229937_x_at  | 140.4  | 133.1  | 237.9  | 253.0  | 225.7  | 311.3  | 390.0  | 419.0  | 380.4  | 1.0        | -1.1        | 1.6         |
| CD40<br>signaling               | A20             | 202644_s_at  | 1467.8 | 1022.2 | 953.3  | 1750.1 | 1961.5 | 2522.5 | 2133.4 | 1061.3 | 1375.4 | -1.6       | 1.3         | 1.4         |
|                                 | TRAF3IP2 (ACT1) | 215411_s_at  | 227.0  | 237.5  | 310.2  | 266.1  | 329.2  | 229.3  | 259.0  | 285.5  | 242.4  | -1.1       | -1.2        | -1.3        |
|                                 | TANK            | 207616_s_at  | 529.4  | 422.6  | 715.7  | 584.4  | 616.1  | 668.7  | 579.2  | 656.9  | 519.8  | -1.1       | -1.3        | <b>-1.4</b> |
|                                 | TRAF1           | 205599_at    | 55.7   | 64.4   | 49.0   | 52.1   | 56.2   | 83.6   | 69.3   | 71.8   | 67.4   | 1.0        | -1.1        | 1.4         |
|                                 | TRAF2           | 204413_at    | 54.2   | 49.0   | 52.6   | 52.6   | 51.3   | 52.1   | 58.8   | 48.4   | 55.8   | -1.1       | 1.2         | 1.1         |
|                                 | TRAF3           | 208315_x_at  | 145.2  | 89.9   | 124.6  | 175.2  | 198.5  | 175.4  | 160.2  | 193.8  | 215.6  | 1.3        | 1.1         | 1.7         |
|                                 | TRAF5           | 204352_at    | 755.6  | 638.0  | 851.7  | 598.2  | 635.6  | 999.7  | 1109.2 | 1072.6 | 1118.1 | 1.0        | 1.0         | 1.3         |
|                                 | TRAF6           | 1569861_at   | 14.0   | 19.8   | 15.3   | 14.1   | 12.1   | 12.7   | 13.3   | 15.5   | 13.8   | 1.0        | -1.1        | -1.1        |
| TLRs                            | TLR1            | 210176_at    | 190.0  | 253.8  | 308.0  | 132.2  | 119.1  | 124.1  | 111.5  | 124.5  | 79.2   | -1.4       | <b>-1.6</b> | <b>-3.9</b> |
|                                 | TLR2            | 204924_at    | 34.3   | 45.6   | 36.3   | 44.4   | 41.6   | 41.6   | 38.4   | 47.5   | 36.5   | -1.1       | -1.3        | 1.0         |
|                                 | TLR3            | 206271_at    | 15.4   | 24.1   | 13.6   | 12.0   | 12.4   | 14.5   | 10.5   | 12.7   | 13.8   | 1.3        | 1.1         | 1.0         |
|                                 | TLR4            | 1552798_s_at | 27.2   | 28.7   | 25.1   | 27.7   | 25.9   | 23.0   | 22.0   | 22.2   | 24.1   | 1.1        | 1.1         | 1.0         |
|                                 | TLR5            | 210166_at    | 26.2   | 46.6   | 23.8   | 27.6   | 25.8   | 23.1   | 20.7   | 24.3   | 25.1   | 1.2        | 1.0         | 1.1         |
|                                 | TLR6            | 239021_at    | 50.6   | 61.5   | 71.4   | 75.9   | 72.7   | 84.3   | 87.2   | 68.2   | 63.6   | -1.4       | -1.1        | -1.1        |
|                                 | TLR7            | 220146_at    | 64.0   | 57.0   | 51.1   | 66.1   | 52.9   | 59.1   | 50.0   | 44.6   | 40.5   | -1.2       | -1.1        | -1.3        |
|                                 | TLR8            | 220832_at    | 19.3   | 19.3   | 19.2   | 17.6   | 19.2   | 13.5   | 16.1   | 18.1   | 18.2   | 1.1        | 1.0         | 1.1         |
|                                 | TLR9            | 223903_at    | 45.6   | 51.4   | 44.9   | 48.1   | 48.5   | 39.5   | 43.0   | 40.8   | 49.5   | -1.2       | -1.2        | -1.1        |
|                                 | TLR10           | 223750_s_at  | 82.5   | 83.7   | 92.2   | 211.4  | 146.7  | 157.8  | 154.2  | 158.0  | 205.3  | 1.3        | 1.3         | 2.2         |
| TLR<br>signaling                | MYD88           | 209124_at    | 691.9  | 544.0  | 552.4  | 620.6  | 684.3  | 569.8  | 616.8  | 715.0  | 769.3  | 1.2        | 1.1         | 1.4         |
|                                 | IRAK1           | 201587_s_at  | 1469.8 | 1158.1 | 1377.0 | 1661.2 | 1663.1 | 1464.4 | 1490.8 | 1345.8 | 1721.5 | 1.2        | 1.3         | 1.3         |
|                                 | IRAK2           | 231779_at    | 46.5   | 71.6   | 104.5  | 163.9  | 233.4  | 170.3  | 139.1  | 276.7  | 265.8  | <b>1.9</b> | 1.0         | <b>2.5</b>  |
|                                 | IRAK4           | 219618_at    | 106.1  | 85.3   | 97.2   | 86.7   | 85.9   | 105.5  | 99.9   | 95.5   | 95.2   | 1.0        | 1.0         | 1.0         |
|                                 | IKBKG (NEMO)    | 209929_s_at  | 149.5  | 131.1  | 155.6  | 124.8  | 123.1  | 147.2  | 160.2  | 184.4  | 165.2  | 1.0        | -1.1        | 1.1         |
|                                 | TIRAP           | 1554091_a_at | 51.1   | 47.0   | 39.9   | 47.5   | 49.8   | 49.5   | 44.1   | 58.1   | 45.4   | 1.0        | -1.1        | 1.1         |
|                                 | TRAF6           | 205558_at    | 132.7  | 116.8  | 117.9  | 141.4  | 141.2  | 119.5  | 126.4  | 126.9  | 120.6  | 1.0        | -1.0        | 1.0         |
|                                 | TBK1            | 218520_at    | 146.2  | 93.8   | 151.2  | 181.8  | 229.4  | 326.9  | 310.0  | 309.7  | 341.4  | 1.1        | 1.1         | <b>2.3</b>  |

|                       |       |             |        |        |        |       |       |       |       |       |       |             |      |              |
|-----------------------|-------|-------------|--------|--------|--------|-------|-------|-------|-------|-------|-------|-------------|------|--------------|
|                       | RIPK1 | 209941_at   | 119.9  | 74.2   | 103.6  | 110.2 | 130.4 | 127.2 | 121.8 | 137.9 | 117.4 | 1.0         | -1.1 | 1.1          |
| interleukins          | IL1B  | 39402_at    | 37.4   | 36.4   | 40.0   | 37.0  | 38.1  | 35.3  | 28.3  | 33.8  | 32.4  | 1.1         | 1.0  | -1.2         |
|                       | IL2   | 209849_s_at | 39.3   | 36.0   | 41.1   | 34.9  | 27.9  | 42.2  | 40.0  | 38.9  | 39.4  | 1.0         | 1.0  | 1.0          |
|                       | IL3   | 207906_at   | 11.4   | 15.2   | 13.0   | 16.4  | 11.9  | 11.5  | 12.3  | 13.1  | 14.0  | 1.1         | 1.1  | 1.1          |
|                       | IL4   | 207539_s_at | 10.8   | 14.7   | 14.2   | 12.7  | 13.3  | 11.7  | 10.8  | 12.7  | 12.5  | 1.2         | 1.0  | -1.1         |
|                       | IL5   | 207952_at   | 16.9   | 20.2   | 17.9   | 20.3  | 17.2  | 17.0  | 15.9  | 13.9  | 19.0  | 1.2         | 1.3  | 1.1          |
|                       | IL6   | 205207_at   | 93.8   | 234.7  | 475.0  | 517.8 | 561.2 | 130.4 | 174.6 | 101.3 | 95.5  | -1.8        | -1.1 | <b>-5.0</b>  |
|                       | IL7   | 206693_at   | 46.3   | 50.2   | 46.4   | 110.7 | 95.1  | 130.5 | 134.8 | 155.1 | 142.9 | 1.1         | -1.1 | 3.1          |
|                       | IL8   | 211506_s_at | 17.5   | 27.7   | 21.1   | 18.0  | 18.2  | 13.9  | 15.3  | 15.3  | 18.9  | 1.2         | 1.2  | -1.1         |
|                       | IL9   | 208193_a    | 14.1   | 17.4   | 13.0   | 14.2  | 11.4  | 11.7  | 10.3  | 12.1  | 10.4  | 1.0         | -1.2 | -1.2         |
|                       | IL10  | 207433_at   | 20.7   | 16.8   | 12.7   | 23.9  | 23.7  | 14.6  | 13.0  | 13.5  | 14.9  | 1.1         | 1.1  | 1.2          |
|                       | IL11  | 206926_s_at | 37.0   | 33.9   | 34.4   | 33.7  | 36.6  | 34.8  | 38.4  | 37.6  | 40.5  | 1.1         | 1.1  | 1.2          |
|                       | IL13  | 207844_at   | 39.0   | 51.8   | 41.2   | 41.2  | 41.2  | 44.9  | 43.6  | 39.6  | 46.6  | 1.1         | 1.2  | 1.1          |
|                       | IL15  | 205992_s_at | 72.3   | 90.7   | 245.0  | 205.5 | 170.3 | 328.9 | 400.7 | 223.1 | 284.9 | <b>-1.4</b> | 1.3  | 1.2          |
|                       | IL16  | 209827_s_at | 364.7  | 387.6  | 421.7  | 343.4 | 331.7 | 261.1 | 378.1 | 426.2 | 447.8 | 1.2         | 1.0  | 1.1          |
|                       | IL17A | 208402_at   | 23.7   | 28.1   | 23.7   | 19.9  | 20.5  | 20.3  | 19.1  | 21.0  | 23.0  | 1.2         | 1.1  | 1.0          |
|                       | IL17B | 220273_at   | 21.4   | 23.9   | 25.2   | 21.2  | 19.8  | 17.6  | 19.1  | 20.5  | 19.1  | 1.0         | -1.1 | -1.3         |
|                       | IL17D | 227401_at   | 24.8   | 30.6   | 25.2   | 28.4  | 25.5  | 22.8  | 21.2  | 25.1  | 22.4  | -1.1        | -1.1 | -1.1         |
|                       | IL17F | 234408_at   | 17.9   | 29.6   | 20.4   | 24.4  | 20.6  | 16.2  | 16.1  | 16.7  | 16.6  | 1.0         | 1.0  | -1.2         |
|                       | IL18  | 206295_at   | 20.0   | 16.7   | 20.1   | 23.9  | 17.8  | 20.5  | 16.6  | 15.6  | 17.6  | -1.1        | -1.1 | -1.1         |
|                       | IL19  | 220745_at   | 37.9   | 45.9   | 40.9   | 40.9  | 36.0  | 33.1  | 35.9  | 39.7  | 38.8  | 1.1         | 1.0  | -1.1         |
|                       | IL20  | 224071_at   | 20.2   | 22.8   | 18.5   | 19.2  | 19.8  | 18.6  | 20.0  | 17.3  | 19.3  | 1.0         | 1.1  | 1.0          |
|                       | IL21  | 221271_at   | 19.3   | 22.9   | 19.2   | 16.8  | 17.5  | 17.6  | 17.6  | 19.2  | 20.2  | 1.1         | 1.1  | 1.1          |
|                       | IL22  | 220056_at   | 37.8   | 44.2   | 40.9   | 34.3  | 37.7  | 33.7  | 32.9  | 34.3  | 39.4  | 1.2         | 1.1  | 1.0          |
|                       | IL23A | 220054_at   | 52.4   | 48.4   | 76.5   | 79.9  | 78.1  | 107.0 | 92.3  | 91.8  | 108.5 | 1.2         | 1.2  | 1.4          |
|                       | IL24  | 206569_at   | 29.3   | 34.1   | 36.7   | 42.7  | 30.9  | 24.4  | 26.5  | 33.6  | 29.6  | -1.1        | 1.1  | -1.2         |
|                       | IL25  | 220971_at   | 37.5   | 39.8   | 26.7   | 33.1  | 34.6  | 31.4  | 33.4  | 29.9  | 36.9  | 1.1         | 1.2  | 1.4          |
|                       | IL26  | 221111_at   | 12.2   | 15.1   | 13.7   | 13.3  | 11.3  | 12.6  | 14.2  | 12.9  | 13.6  | 1.0         | 1.0  | 1.0          |
|                       | IL27  | 1552995_at  | 54.1   | 50.6   | 56.7   | 57.6  | 58.5  | 43.4  | 46.1  | 51.1  | 50.3  | 1.1         | 1.0  | 1.0          |
|                       | IL29  | 1552917_at  | 30.4   | 44.4   | 33.2   | 30.5  | 33.1  | 23.7  | 25.7  | 29.9  | 33.7  | 1.3         | 1.1  | 1.0          |
|                       | IL32  | 203828_s_at | 27.8   | 29.2   | 30.3   | 29.0  | 27.6  | 23.3  | 22.4  | 28.0  | 24.4  | 1.1         | -1.1 | -1.2         |
|                       | IL33  | 209821_at   | 8.4    | 12.8   | 9.5    | 8.4   | 9.9   | 7.7   | 7.0   | 8.3   | 8.2   | 1.2         | 1.0  | -1.1         |
|                       | IL34  | 237046_x_at | 64.5   | 63.1   | 65.1   | 67.2  | 65.7  | 62.0  | 59.9  | 59.8  | 71.4  | 1.2         | 1.2  | 1.1          |
|                       | TNF   | 207113_s_at | 28.7   | 36.9   | 33.4   | 46.0  | 55.0  | 38.3  | 48.8  | 35.5  | 36.0  | -1.4        | 1.0  | -1.1         |
| interleukin receptors | IL1R1 | 215561_s_at | 18.2   | 19.9   | 20.9   | 18.4  | 21.3  | 17.7  | 18.6  | 18.2  | 16.6  | -1.1        | -1.1 | -1.3         |
|                       | IL1R2 | 211372_s_at | 23.4   | 31.4   | 24.4   | 22.7  | 24.3  | 22.7  | 19.9  | 23.5  | 24.7  | 1.2         | 1.0  | 1.0          |
|                       | IL1RB | 39402_at    | 37.4   | 36.4   | 40.0   | 37.0  | 38.1  | 35.3  | 28.3  | 33.8  | 32.4  | 1.1         | 1.0  | -1.2         |
|                       | IL2RA | 206341_at   | 27.1   | 30.4   | 30.3   | 33.6  | 39.0  | 47.6  | 43.4  | 38.4  | 33.5  | -1.3        | -1.1 | 1.1          |
|                       | IL2RB | 205291_at   | 34.0   | 45.0   | 33.9   | 49.4  | 46.4  | 59.2  | 56.6  | 55.1  | 77.9  | 1.4         | 1.4  | 2.3          |
|                       | IL2RG | 204116_at   | 129.8  | 255.1  | 180.2  | 158.5 | 116.8 | 144.6 | 130.5 | 147.0 | 128.0 | -1.0        | -1.1 | -1.4         |
|                       | IL3RA | 206148_at   | 81.9   | 59.4   | 46.4   | 43.5  | 48.2  | 39.7  | 38.9  | 37.4  | 48.9  | 1.3         | 1.3  | 1.1          |
|                       | IL3R  | 207906_at   | 11.4   | 15.2   | 13.0   | 16.4  | 11.9  | 11.5  | 12.3  | 13.1  | 14.0  | 1.1         | 1.1  | 1.1          |
|                       | IL4R  | 203233_at   | 1800.4 | 2788.7 | 3255.0 | 316.8 | 261.6 | 219.3 | 161.5 | 529.4 | 282.3 | 1.7         | -1.9 | <b>-11.5</b> |
|                       | IL5RA | 211517_s_at | 26.2   | 39.2   | 47.0   | 28.0  | 30.4  | 54.8  | 47.5  | 40.1  | 41.0  | -1.2        | 1.0  | -1.1         |

|                       |                |             |        |        |        |        |        |        |        |        |        |             |             |             |
|-----------------------|----------------|-------------|--------|--------|--------|--------|--------|--------|--------|--------|--------|-------------|-------------|-------------|
| IL5R                  | 207952_at      | 16.9        | 20.2   | 17.9   | 20.3   | 17.2   | 17.0   | 15.9   | 13.9   | 19.0   | 1.2    | 1.4         | 1.1         |             |
| IL6R                  | 226333_at      | 24.7        | 34.3   | 29.7   | 51.0   | 49.2   | 105.4  | 73.1   | 48.4   | 79.5   | 1.1    | 1.6         | <b>2.7</b>  |             |
| IL7R                  | 205798_at      | 24.7        | 35.6   | 26.1   | 26.2   | 26.5   | 25.2   | 22.9   | 29.7   | 25.3   | 1.1    | -1.2        | 1.0         |             |
| IL9R                  | 217212_s_at    | 38.2        | 32.1   | 34.3   | 33.8   | 31.8   | 34.7   | 33.9   | 29.2   | 33.8   | 1.0    | 1.2         | 1.0         |             |
| IL10RA                | 204912_at      | 466.7       | 870.8  | 908.8  | 1392.7 | 1639.9 | 1321.2 | 1379.3 | 1544.4 | 1454.3 | 1.1    | -1.1        | <b>1.6</b>  |             |
| IL10RB                | 209575_at      | 226.1       | 179.4  | 150.2  | 270.1  | 212.9  | 163.4  | 173.3  | 198.7  | 166.3  | 1.0    | -1.2        | 1.1         |             |
| IL11RA                | 204773_at      | 62.9        | 54.0   | 94.7   | 57.9   | 86.0   | 109.5  | 119.3  | 88.8   | 84.4   | -1.4   | 1.0         | -1.1        |             |
| IL12RB1               | 206890_at      | 43.4        | 48.4   | 39.9   | 40.9   | 39.2   | 31.9   | 39.9   | 36.6   | 40.5   | 1.0    | 1.1         | 1.0         |             |
| IL12RB2               | 206999_at      | 17.7        | 21.0   | 16.4   | 15.1   | 15.2   | 16.3   | 14.9   | 16.4   | 14.4   | 1.0    | -1.1        | -1.1        |             |
| IL13RA1               | 201887_at      | 39.4        | 106.7  | 147.9  | 93.3   | 87.7   | 397.2  | 258.1  | 407.5  | 213.5  | -1.2   | <b>-1.9</b> | 1.4         |             |
| IL15RA                | 207375_s_at    | 49.2        | 55.6   | 47.1   | 53.3   | 59.8   | 82.4   | 77.1   | 72.9   | 70.5   | -1.1   | 1.0         | 1.5         |             |
| IL17RC                | 221926_s_at    | 64.5        | 63.3   | 46.2   | 48.4   | 48.2   | 42.2   | 43.6   | 43.1   | 39.8   | -1.1   | -1.1        | -1.2        |             |
| IL17RB                | 224361_s_at    | 34.3        | 47.2   | 35.0   | 35.7   | 44.2   | 30.8   | 33.2   | 32.9   | 31.3   | -1.1   | -1.1        | -1.1        |             |
| IL17RA                | 205707_at      | 180.9       | 142.1  | 149.2  | 144.1  | 146.8  | 145.2  | 148.9  | 145.6  | 143.5  | 1.0    | 1.0         | 1.0         |             |
| IL21R                 | 221658_s_at    | 245.6       | 154.1  | 98.0   | 40.9   | 28.3   | 22.0   | 19.4   | 33.3   | 42.4   | 2.2    | 1.3         | -2.3        |             |
| IL22RA1               | 220056_at      | 37.8        | 44.2   | 40.9   | 34.3   | 37.7   | 33.7   | 32.9   | 34.3   | 39.4   | 1.2    | 1.1         | 1.0         |             |
| IL23R                 | 1561853_a_at   | 20.0        | 27.1   | 22.2   | 20.8   | 19.4   | 16.8   | 15.9   | 18.9   | 18.0   | 1.1    | 1.0         | -1.2        |             |
| TGFBR1                | 224793_s_at    | 243.4       | 237.6  | 271.5  | 677.6  | 710.3  | 208.4  | 284.8  | 345.4  | 426.6  | 1.5    | 1.2         | 1.6         |             |
| TGFBR2                | 208944_at      | 1296.5      | 1168.9 | 1535.6 | 1358.0 | 1467.1 | 675.7  | 843.2  | 914.0  | 881.7  | 1.0    | 1.0         | -1.7        |             |
| RARA                  | 201605_x_at    | 756.4       | 720.7  | 558.6  | 640.1  | 612.5  | 488.1  | 490.4  | 532.2  | 551.6  | 1.1    | 1.0         | 1.0         |             |
| transcription factors | PRDM1 (BLIMP1) | 217192_s_at | 50.8   | 55.7   | 55.5   | 58.3   | 56.4   | 74.9   | 72.0   | 68.8   | 63.2   | -1.1        | -1.1        | -1.1        |
|                       | FOXO1          | 202723_s_at | 1119.5 | 1120.3 | 1458.5 | 558.7  | 536.1  | 371.7  | 393.7  | 446.2  | 324.8  | -1.2        | -1.4        | <b>-4.5</b> |
|                       | IRF4           | 204562_at   | 175.3  | 126.5  | 120.7  | 166.4  | 212.6  | 167.6  | 234.2  | 180.9  | 219.6  | -1.1        | 1.2         | 1.8         |
|                       | KLF2           | 219371_s_at | 4581.5 | 6246.3 | 6085.8 | 5168.3 | 4143.3 | 5815.8 | 4573.6 | 5177.5 | 3506.9 | -1.3        | <b>-1.5</b> | <b>-1.7</b> |
|                       | KLF4           | 221841_s_at | 1052.4 | 1579.9 | 1343.9 | 572.3  | 217.2  | 620.3  | 442.6  | 189.9  | 176.8  | -2.5        | -1.1        | <b>-7.6</b> |
|                       | KLF9           | 203542_s_at | 969.8  | 1216.6 | 1640.5 | 1825.1 | 1318.6 | 869.2  | 928.8  | 1009.8 | 879.6  | -1.1        | -1.1        | -1.9        |
|                       | NOTCH2         | 202443_x_at | 791.3  | 743.8  | 745.5  | 887.4  | 821.0  | 827.4  | 945.0  | 943.5  | 873.0  | -1.1        | -1.1        | 1.2         |
|                       | PAK2 (p21)     | 208877_at   | 524.1  | 457.2  | 503.8  | 767.3  | 779.0  | 644.3  | 596.0  | 706.7  | 740.1  | 1.2         | 1.0         | 1.5         |
|                       | PAX5           | 221969_at   | 4639.4 | 3919.2 | 5064.9 | 3251.1 | 3161.1 | 3160.1 | 3450.2 | 3462.2 | 2899.5 | -1.2        | -1.2        | <b>-1.7</b> |
|                       | ZBTB16 (PZLF)  | 205883_at   | 29.6   | 56.9   | 177.4  | 41.1   | 30.9   | 25.2   | 31.2   | 43.8   | 39.4   | 1.3         | -1.1        | <b>-4.5</b> |
|                       | RORA           | 210426_x_at | 17.2   | 17.9   | 21.4   | 188.0  | 206.0  | 354.8  | 339.8  | 165.1  | 283.2  | -1.2        | 1.7         | <b>13.2</b> |
|                       | RUNX1          | 209360_s_at | 214.8  | 161.8  | 184.5  | 164.7  | 143.5  | 135.2  | 136.0  | 172.3  | 137.4  | 1.0         | -1.3        | -1.3        |
|                       | RUNX2          | 232231_at   | 12.9   | 15.4   | 15.2   | 22.3   | 78.1   | 44.2   | 204.2  | 60.1   | 483.2  | <b>2.4</b>  | <b>8.0</b>  | <b>31.9</b> |
|                       | RUNX3          | 204198_s_at | 1188.5 | 1153.5 | 1444.0 | 1821.8 | 2343.7 | 2212.5 | 2005.9 | 1880.6 | 1948.0 | 1.0         | 1.0         | 1.3         |
|                       | SOX5           | 207336_at   | 64.7   | 33.9   | 33.6   | 150.1  | 76.6   | 47.3   | 48.2   | 74.6   | 68.2   | 1.4         | -1.1        | 2.0         |
|                       | SPIB           | 205861_at   | 333.8  | 207.0  | 168.9  | 262.3  | 253.6  | 237.2  | 266.6  | 211.0  | 218.5  | -1.2        | -1.0        | 1.3         |
|                       | TBX21(Tbet)    | 220684_at   | 33.6   | 52.9   | 45.6   | 79.8   | 65.4   | 92.1   | 91.7   | 110.4  | 75.6   | -1.2        | -1.5        | 1.7         |
| chemokine receptors   | CXCR1          | 207094_at   | 59.5   | 74.5   | 49.1   | 57.5   | 62.3   | 44.5   | 46.0   | 50.5   | 46.1   | 1.0         | -1.1        | -1.1        |
|                       | CXCR2          | 207008_at   | 18.7   | 22.7   | 21.5   | 18.2   | 19.3   | 21.4   | 19.9   | 18.1   | 22.4   | 1.1         | 1.2         | 1.0         |
|                       | CXCR3          | 217199_s_at | 37.2   | 33.8   | 36.2   | 33.0   | 32.6   | 38.6   | 34.8   | 39.4   | 34.7   | 1.0         | -1.1        | 1.0         |
|                       | CXCR4          | 209201_x_at | 4233.9 | 5514.2 | 3675.7 | 3376.7 | 3564.5 | 1772.1 | 2327.8 | 2614.2 | 1614.5 | -1.4        | -1.6        | -2.3        |
|                       | CXCR5          | 206126_at   | 429.7  | 367.1  | 459.7  | 788.3  | 952.2  | 370.0  | 510.4  | 429.8  | 436.7  | -1.2        | 1.0         | -1.1        |

|                    |               |             |       |        |        |        |        |        |        |        |        |            |            |             |
|--------------------|---------------|-------------|-------|--------|--------|--------|--------|--------|--------|--------|--------|------------|------------|-------------|
|                    | CXCR6         | 211469_s_at | 28.9  | 42.0   | 39.6   | 33.7   | 31.5   | 34.8   | 28.8   | 34.6   | 34.2   | 1.2        | 1.0        | -1.2        |
|                    | CCR1          | 205099_s_at | 19.4  | 18.5   | 21.0   | 22.9   | 22.2   | 20.8   | 21.6   | 19.8   | 23.4   | 1.1        | 1.2        | 1.1         |
|                    | CCR2          | 207794_at   | 19.0  | 25.8   | 22.8   | 19.1   | 15.6   | 19.2   | 23.6   | 22.2   | 21.1   | -1.1       | 1.0        | -1.1        |
|                    | CCR3          | 208304_at   | 18.5  | 28.1   | 18.2   | 17.6   | 19.8   | 17.5   | 17.4   | 20.6   | 21.7   | 1.2        | 1.1        | 1.2         |
|                    | CCR4          | 208376_at   | 40.7  | 49.3   | 35.2   | 41.0   | 36.6   | 37.1   | 37.4   | 42.4   | 43.4   | 1.2        | 1.0        | 1.2         |
|                    | CCR5          | 206991_s_at | 27.8  | 36.5   | 28.2   | 30.2   | 32.4   | 27.4   | 26.2   | 30.0   | 27.9   | 1.1        | -1.1       | 1.0         |
|                    | CCR6          | 206983_at   | 50.7  | 62.0   | 101.7  | 162.7  | 121.8  | 67.8   | 97.1   | 112.8  | 86.8   | -1.1       | -1.3       | 1.2         |
|                    | CCR7          | 206337_at   | 132.6 | 356.3  | 660.6  | 305.2  | 296.1  | 250.1  | 334.9  | 402.3  | 250.0  | -1.3       | -1.6       | <b>-2.6</b> |
|                    | CCR8          | 208059_at   | 19.4  | 32.8   | 18.0   | 17.9   | 19.7   | 19.5   | 21.5   | 19.5   | 20.8   | 1.0        | 1.1        | 1.2         |
|                    | CCR9          | 207445_s_at | 45.7  | 29.7   | 20.1   | 29.8   | 44.8   | 17.4   | 35.6   | 20.5   | 87.3   | <b>2.5</b> | <b>4.3</b> | <b>4.4</b>  |
|                    | CCR10         | 220565_at   | 27.4  | 34.0   | 30.6   | 28.6   | 31.2   | 34.8   | 34.9   | 26.9   | 26.1   | -1.3       | 1.0        | -1.2        |
|                    | CX3CR1        | 205898_at   | 27.2  | 31.5   | 27.1   | 18.3   | 20.8   | 24.7   | 29.0   | 27.6   | 42.4   | 1.5        | 1.5        | 1.6         |
|                    | XCR1          | 1561226_at  | 29.0  | 32.0   | 28.4   | 28.6   | 26.8   | 24.5   | 24.3   | 24.6   | 25.4   | 1.0        | 1.0        | -1.1        |
| adhesion molecules | ITGAL (CD11A) | 213475_s_at | 130.1 | 110.7  | 166.3  | 217.4  | 201.0  | 360.9  | 326.4  | 229.9  | 274.0  | -1.2       | 1.2        | 1.6         |
|                    | ITGA4 (CD49D) | 213416_at   | 639.8 | 497.5  | 692.7  | 527.4  | 388.4  | 960.5  | 712.7  | 866.7  | 812.6  | 1.1        | -1.1       | 1.2         |
|                    | ITGB1 (CD29)  | 211945_s_at | 379.6 | 189.0  | 292.3  | 1075.1 | 1000.0 | 2920.9 | 2067.4 | 1560.3 | 1467.9 | -1.4       | -1.1       | <b>5.0</b>  |
|                    | ITGB2 (CD18)  | 202803_s_at | 546.6 | 557.5  | 598.7  | 604.5  | 408.5  | 534.3  | 493.6  | 739.1  | 591.8  | 1.2        | -1.2       | 1.0         |
|                    | ITGB7         | 205718_at   | 261.7 | 171.0  | 170.0  | 174.7  | 193.2  | 157.3  | 147.5  | 152.5  | 149.6  | 1.0        | 1.0        | -1.1        |
|                    | SELL (CD62L)  | 204563_at   | 778.4 | 1347.5 | 1240.4 | 823.7  | 780.0  | 918.5  | 892.2  | 964.3  | 666.0  | -1.3       | -1.4       | -1.9        |

Statistically significant differences between CD27-IgA+, and mat. naive, CD27+IgA+ and CD27-IgG+ memory-B cells are depicted in bold. Fold change was calculated by determining the absolute value of the ratio of transcript expression between the indicated populations. Values were assigned a negative value if gene expression was lower in CD27-IgA+ as compared to the indicated control population.

**SUPPLEMENTAL TABLE II.** Repertoire and reactivity of antibodies from CD27+IgA+ and CD27-IgA+ B cells of 5donors.

| Ig        | HEAVY     |      |      |    |     |             |                 |        |           |      | LIGHT |            |             |           |      | REACTIVITY |     |           |                   |                    |                  |                   |                 |               |   |
|-----------|-----------|------|------|----|-----|-------------|-----------------|--------|-----------|------|-------|------------|-------------|-----------|------|------------|-----|-----------|-------------------|--------------------|------------------|-------------------|-----------------|---------------|---|
|           | VH        | DH   | RF   | JH | (-) | CDR3 (aa)   | (+)             | Length | No of SHM | Vκ   | Jκ    | CDR3 (aa)  | Length      | No of SHM | Poly | Hep2       | IFA | flagellin | <i>B.fragilis</i> | <i>C.difficile</i> | <i>E.cloacae</i> | <i>E.faecalis</i> | <i>S.aureus</i> | <i>E.coli</i> |   |
| CD27+IgA+ | donor1-01 | 3-66 | 6-19 | 3  | 4   | 1           | VLPFSPSGGWTPFDR | 0      | 15        | 19   | 1-5   | 1          | QQYDTPWWT   | 9         | 9    |            |     |           |                   |                    |                  |                   |                 |               |   |
|           | donor1-04 | 4-59 | 3-3  | 1  | 5   | 2           | TVLLEWFFFEP     | 0      | 11        | 26   | 3-20  | 3          | QQYGSSPFT   | 9         | 11   | -          | -   | -         | -                 | -                  | -                | -                 | -               | -             | - |
|           | donor1-05 | 3-9  | 5-24 | 2  | 6   | 2           | DGRYSYMDV       | 1      | 9         | 29   | 3-15  | 5          | QQYNYWPLT   | 9         | 22   |            |     |           |                   |                    |                  |                   |                 |               |   |
|           | donor1-06 | 5-51 | 3-10 | 2  | 4   | 1           | RSGYSASDF       | 1      | 9         | 41   | 1-5   | 4          | QEYDSYSGS   | 9         | 24   |            |     |           |                   |                    |                  |                   |                 |               |   |
|           | donor1-07 | 3-13 | 5-12 | 2  | 4   | 2           | VRYDHGYDL       | 2      | 9         | 22   | 1-39  | 2          | QQSYSTLLYN  | 10        | 1    | -          | +   | -         | -                 | -                  | -                | -                 | -               | -             | - |
|           | donor1-08 | 3-23 | 3-10 | 1  | 5   | 3           | DRGVGEILNNWFD   | 0      | 14        | 20   | 3-15  | 4          | QQHSDWPLT   | 9         | 14   | -          | -   | -         | -                 | -                  | -                | -                 | +               | -             | - |
|           | donor1-09 | 3-15 | /    | /  | 4   | 1           | TTGSVEGY        | 0      | 8         | 20   |       |            |             |           |      |            |     |           |                   |                    |                  |                   |                 |               |   |
|           | donor1-11 | 4-4  | 3-9  | 1  | 5   | 2           | GDTYDWFNS       | 0      | 10        | 31   | 3-20  | 4          | QHYATSPLT   | 9         | 21   |            |     |           |                   |                    |                  |                   |                 |               |   |
|           | donor1-12 | 4-31 | /    | /  | 4   | 1           | RPGNRFTYLGVC    | 2      | 14        | 27   | 3-20  | 2          | QQYGRSPYS   | 9         | 12   | -          | -   | -         | -                 | +                  | +                | +                 | +               | +             | + |
|           | donor1-14 | 1-2  | 2-2  | 2  | 4   | 2           | DHCSGTSCYAVD    | 0      | 12        | 28   | 1-33  | 4          | QQYDDLRLT   | 9         | 12   | -          | -   | -         | -                 | -                  | -                | -                 | -               | -             | - |
|           | donor1-17 | 3-7  | 5-24 | 2  | 4   | 0           | GFGPGY          | 0      | 6         | 4    | 4-1   | 1          | QQYYNTPPWT  | 10        | 9    | -          | -   | -         | -                 | +                  | +                | +                 | +               | -             | - |
|           | donor1-19 | 3-30 | 3-16 | 1  | 4   | 4           | DLGDDYPSLG      | 0      | 14        | 9    | 1-39  | 2          | QQSYSTPPVFT | 11        | 13   | -          | +   | -         | -                 | +                  | +                | -                 | +               | -             | + |
|           | donor1-20 | 3-74 | 1-26 | 3  | 4   | 1           | LRVGAAIPHG      | 2      | 13        | 36   | 3-20  | 2          | QQYDGPYPT   | 9         | 2    | -          | +   | -         | -                 | -                  | -                | -                 | -               | -             | - |
|           | donor1-21 | 4-39 | /    | /  | 1   | 1           | HFYAETFQN       | 1      | 9         | 21   | 3-20  | 4          | QHYATSPLT   | 9         | 24   |            |     |           |                   |                    |                  |                   |                 |               |   |
|           | donor1-26 | 3-30 | /    | /  | 6   | 2           | DRISPSGPKIVY    | 2      | 19        | 39   | 3-11  | 3          | QLGRTWPPA   | 9         | 18   | -          | -   | -         | -                 | -                  | +                | +                 | -               | -             | + |
|           | donor1-27 | 3-9  | /    | /  | 6   | 2           | GKDISRGGMDV     | 1      | 9         | 32   |       |            |             |           |      |            |     |           |                   |                    |                  |                   |                 |               |   |
|           | donor1-29 | 3-23 | /    | /  | 4   | 3           | AKDRTGGADTLDY   | 2      | 11        | 8    | 1-6   | 4          | LQDYNYPRT   | 9         | 4    | -          | -   | -         | -                 | -                  | -                | -                 | -               | -             | - |
|           | donor1-30 | 5-51 | 2-21 | 2  | 6   | 1           | SYCASTSCQTRG    | 1      | 18        | 14   |       |            |             |           |      |            |     |           |                   |                    |                  |                   |                 |               |   |
|           | donor1-31 | 3-24 | /    | /  | 4   | 1           | SLRGAVTVRDY     | 2      | 11        | 12   | 3-20  | 3          | QQFGSSRFT   | 9         | 6    | -          | +   | -         | -                 | -                  | +                | -                 | +               | +             | + |
|           | donor1-34 | 3-15 | 3-10 | 3  | 5   | 0           | QTRNTVVRGVP     | 2      | 18        | 16   | 4-1   | 4          | QQYYSSPLT   | 9         | 10   | +          | -   | -         | -                 | -                  | -                | -                 | -               | -             | - |
| donor1-37 | 3-7       | 5-5  | 2    | 4  | 0   | VRGYGNHWF   | 2               | 11     | 21        | 3-20 | 1     | HQYVGPWT   | 9           | 13        | -    | +          | -   | -         | -                 | -                  | -                | -                 | -               | -             |   |
| donor1-38 |           |      |      |    |     |             |                 |        |           | 1-39 | 3     | QQSYNFPRT  | 9           | 17        |      |            |     |           |                   |                    |                  |                   |                 |               |   |
| donor1-39 | 3-7       | /    | /    | 4  | 1   | IFSGLTFDY   | 0               | 9      | 28        | 1-8  | 3     | QQYSSYPFT  | 9           | 14        | -    | -          | -   | -         | -                 | -                  | -                | -                 | -               | -             |   |
| donor1-41 | 3-15      | 3-10 | 3    | 3  | 2   | VREGVIAAFDI | 1               | 11     | 17        | 1-33 | 5     | QQYDNLRLIT | 10          | 4         | -    | -          | -   | -         | -                 | +                  | -                | -                 | -               | -             |   |
| CD27-IgA+ | donor1-49 | 1-2  | /    | /  | 5   | 2           | RKGDLLGEG       | 2      | 9         | 4    | 1-12  | 4          | QQANSFPLT   | 9         | 4    | +          | -   | c         | -                 | -                  | -                | -                 | -               | -             |   |
|           | donor1-52 | 4-59 | 3-16 | 3  | 4   | 1           | GFGGVIADY       | 0      | 9         | 0    | 3-11  | 2          | QQRSNWPPEYT | 11        | 0    |            |     |           |                   |                    |                  |                   |                 |               |   |
|           | donor1-59 | 4-59 | 2-2  | 2  | 4   | 1           | VREGYCSSTSCY    | 1      | 15        | 1    | 3-15  | 3          | QQYNNWPL    | 8         | 0    | -          | -   | -         | -                 | -                  | -                | -                 | -               | -             |   |
|           | donor1-60 | 3-33 | 5-24 | 2  | 3   | 2           | DGGGGHFDI       | 1      | 8         | 0    | 1-39  | 1          | QQSYSTTWT   | 9         | 0    | -          | -   | -         | -                 | -                  | -                | -                 | -               | -             |   |
|           | donor1-62 | 3-23 | 6-19 | 2  | 4   | 1           | FSGWYRGLDY      | 1      | 11        | 11   | 1-27  | 3          | QKYNAPFT    | 9         | 2    | +          | -   | c         | +                 | +                  | +                | +                 | +               | +             |   |
|           | donor1-65 | 4-59 | 3-16 | 3  | 4   | 1           | GFGGVIADY       | 0      | 9         | 0    | 3-20  | 3          | QQHGGSPMT   | 9         | 12   |            |     |           |                   |                    |                  |                   |                 |               |   |
|           | donor1-71 | 1-2  | 6-19 | 3  | 5   | 2           | DQVGRAVAGW      | 1      | 13        | 9    | 3-15  | 2          | QQHNNWPYS   | 9         | 4    | -          | +   | -         | -                 | -                  | +                | +                 | +               | -             | + |
|           | donor1-72 | 3-21 | 6-13 | 1  | 6   | 4           | DREQLDHLVTG     | 1      | 20        | 18   | 1-5   | 1          | QQYNGYSRT   | 9         | 5    | +          | -   | N         | -                 | +                  | +                | +                 | +               | -             |   |
|           | donor1-73 | 3-48 | 1-7  | 2  | 4   | 2           | DWWNWNSDN       | 0      | 9         | 10   | 4-1   | 2          | QQYYSTPSYT  | 10        | 2    |            |     |           |                   |                    |                  |                   |                 |               |   |
|           | donor1-74 | 3-15 | 2-21 | 3  | 4   | 1           | APAVTARPLDY     | 1      | 12        | 22   | 1-5   | 2          | QQYSDYPMYS  | 10        | 10   |            |     |           |                   |                    |                  |                   |                 |               |   |











|           |           |      |      |   |   |   |                     |   |    |    |      |   |                  |    |    |   |   |   |   |   |   |   |   |   |   |
|-----------|-----------|------|------|---|---|---|---------------------|---|----|----|------|---|------------------|----|----|---|---|---|---|---|---|---|---|---|---|
|           | donor2-58 | 3-30 | 3-10 | 3 | 4 | 1 | AQGITIVQPFDC        | 0 | 12 | 12 | 2-14 | 2 | SSYTSSSTMI       | 10 | 9  | - | + | - | - | - | - | + | + | - | + |
|           | donor2-64 | 3-30 | 3-3  | 2 | 4 | 2 | QGIVDFWRSRFFVDH     | 2 | 15 | 32 | 1-51 | 3 | GTWDSLSAGM       | 11 | 17 | + | + | - | + | + | + | + | + | + | + |
|           | donor2-65 | 1-69 | 6-13 | 3 | 6 | 2 | DRIAAATYLGYYYYYMDV  | 1 | 18 | 1  | 3-1  | 2 | QAWDSSVVV        | 9  | 0  | + | + | - | - | + | + | + | + | + | + |
|           | donor2-70 | 1-2  | 4-17 | 2 | 5 | 2 | ADYGDYPNF           | 0 | 9  | 7  |      |   |                  |    |    |   |   |   |   |   |   |   |   |   |   |
|           | donor2-82 | 3-33 | /    | / | 4 | 1 | RSRIGGTFFYFDY       | 2 | 12 | 9  | 1-40 | 3 | QSYDSSLGWV       | 11 | 4  | - | - | - | - | - | - | - | - | - | - |
|           | donor2-88 | 3-30 | 4-23 | 3 | 4 | 3 | VGEPTVDPLFDY        | 0 | 12 | 1  | 3-1  | 2 | QAWDSGTVV        | 9  | 5  | - | - | - | - | - | - | - | - | - | - |
|           | donor2-91 |      |      |   |   |   |                     |   |    |    | 2-11 | 1 | CSYAGSYYV        | 9  | 5  |   |   |   |   |   |   |   |   |   |   |
|           | donor2-92 | 3-11 | 4-17 | 2 | 3 | 5 | LADYGDYGDDAFDI      | 0 | 14 | 7  | 1-40 | 1 | QSYDSSLGYV       | 11 | 9  | - | - | - | - | - | - | - | - | - | - |
| CD27+IgA+ | donor3-14 | 3-23 | 3-9  | 1 | 4 | 2 | VGPFYDILTAYDY       | 0 | 13 | 14 |      |   |                  |    |    |   |   |   |   |   |   |   |   |   |   |
|           | donor3-23 | 4-34 | 4-17 | 2 | 4 | 3 | RLGVETTTDYFDY       | 1 | 13 | 9  | 1-51 | 3 | GAWDSSLAGV       | 11 | 12 | - | - | - | - | - | - | + | - | + | + |
|           | donor3-32 | 3-30 | 6-13 | 3 | 4 | 1 | VPAGTRSYIDY         | 1 | 11 | 21 | 1-40 | 2 | QSFDSLSGHVL      | 12 | 8  | - | - | - | - | - | - | - | - | - | - |
|           | donor3-33 | 5-51 | 6-19 | 2 | 6 | 2 | QGNYSWYLGADFGLDV    | 0 | 16 | 17 | 2-8  | 1 | SSYAGSYTYV       | 10 | 13 | + | + | - | + | + | + | + | + | + | + |
|           | donor3-44 | 1-46 | 3-10 | 2 | 4 | 2 | ARETTMVTWDY         | 1 | 11 | 12 | 2-14 | 1 | SSYTSSNSYV       | 10 | 10 | - | - | - | - | - | - | - | - | - | - |
| CD27-IgA+ | donor3-66 | 5-51 | 5-24 | 2 | 5 | 1 | WGGYPVAPMKNFFDL     | 1 | 15 | 15 | 2-14 | 2 | TSYSSSYTHV       | 11 | 12 | - | - | - | - | - | - | - | - | - | - |
|           | donor3-67 | 4-59 | 4-17 | 1 | 5 | 2 | HSTYREVRFP          | 2 | 11 | 6  | 2-8  | 2 | SSYAGSKNLV       | 10 | 9  | - | - | - | - | - | - | - | - | - | - |
|           | donor3-71 | 1-46 | 6-19 | 2 | 5 | 3 | DAPRSSAWYTLPEHSPWLD | 2 | 20 | 23 | 2-11 | 2 | ISYAGGYIFV       | 10 | 31 | + | - | - | + | + | + | + | + | + | + |
| CD27+IgA+ | donor4-13 | 3-48 | 4-23 | 2 | 4 | 1 | SSPLAGNSYQVDY       | 0 | 13 | 23 | 1-51 | 2 | GAWDSSLSAGA      | 11 | 25 |   |   |   |   |   |   |   |   |   |   |
|           | donor4-14 | 3-23 | 1-26 | 2 | 4 | 1 | GRYSGSYLQTD         | 1 | 13 | 31 | 1-44 | 2 | AAWDRPNAA<br>V   | 11 | 10 | - | - | - | - | - | - | - | - | - | - |
|           | donor4-34 | 3-74 | 2-21 | 2 | 4 | 3 | DLEQCTGDCLLF        | 0 | 12 | 27 | 2-8  | 1 | SSYVGSSKNYV      | 11 | 17 | - | - | - | - | - | - | - | - | - | - |
|           | donor4-44 | 3-30 | 3-22 | 2 | 4 | 2 | ALYYYDSSGYPPDY      | 0 | 14 | 18 | 2-18 | 1 | SSYTASGTNV       | 10 | 19 | + | + | - | - | + | - | - | + | - | - |
| CD27-IgA+ | donor4-50 | 3-7  | 5-18 | 3 | 4 | 2 | VRGYSFGDVVDY        | 1 | 12 | 15 | 3-21 | 1 | QVWDISNAHAT<br>V | 12 | 6  |   |   |   |   |   |   |   |   |   |   |
|           | donor4-59 | 3-21 | 2-8  | 2 | 4 | 2 | DQGWLWPKPDY         | 1 | 11 | 0  | 1-44 | 2 | AAWDDSLNGLE      | 11 | 0  | + | + | - | + | + | - | + | + | - | - |
|           | donor4-60 | 3-33 | 3-10 | 2 | 4 | 2 | DQYFSGSGYNFDY       | 0 | 13 | 19 | 2-11 | 3 | CSYAGSYTLL       | 10 | 13 | - | - | - | - | - | - | - | - | - | - |
|           | donor4-67 | 3-21 | 3-10 | 2 | 3 | 1 | INYNAFDI            | 0 | 8  | 6  | 2-23 | 3 | CSYAGSSTLGV      | 11 | 7  | - | - | - | - | - | - | - | - | - | - |
|           | donor4-71 | 3-72 | 3-16 | 3 | 3 | 2 | EHRSQGGGAFDI        | 2 | 13 | 2  | 3-1  | 1 | QAWDSSTYYV       | 10 | 3  | - | - | - | - | - | - | - | - | - | - |
|           | donor4-73 | 3-30 | 3-16 | 3 | 4 | 1 | GMLTFGGVLTQVYFDF    | 0 | 18 | 15 | 1-44 | 2 | ATWDGSLNGPV      | 11 | 7  | + | - | - | - | - | - | - | - | - | + |
|           | donor4-74 | 3-15 | 1-26 | 3 | 4 | 1 | SGSYFFRLDS          | 1 | 10 | 17 | 2-14 | 2 | SSYTSSSTLV       | 10 | 5  | + | - | - | - | - | + | + | + | - | + |
|           | donor4-75 | 3-7  | 2-8  | 3 | 4 | 2 | DMGLHGVSDY          | 1 | 10 | 15 | 3-21 | 3 | HVWDGSEHRV       | 11 | 16 | - | - | - | - | - | - | - | - | - | - |
|           | donor4-76 | 3-21 | 5-18 | 1 | 3 | 4 | DPGVDTGTGTHDAFDI    | 1 | 17 | 18 | 3-27 | 3 | YSAADNSLGV       | 10 | 2  |   |   |   |   |   |   |   |   |   |   |
|           | donor4-77 | 4-4  | 4-17 | 2 | 6 | 3 | RLDGDYGGMDV         | 1 | 12 | 4  | 3-1  | 2 | QAWDSSTVV        | 9  | 4  | - | - | - | - | - | - | - | - | - | - |
|           | donor4-85 | 5-51 | 3-22 | 2 | 4 | 3 | LGDYDSSGLRD         | 1 | 12 | 3  | 2-14 | 2 | SSYTSSSTLVV      | 11 | 6  |   |   |   |   |   |   |   |   |   |   |
|           | donor4-86 | 4-59 | 4-17 | 3 | 4 | 1 | ASTFTVTGDY          | 0 | 10 | 15 | 2-14 | 3 | NSYTSTSSLV       | 10 | 8  | - | - | - | - | + | - | - | - | - | - |
|           | donor4-89 | 3-21 | 6-13 | 1 | 4 | 1 | GGTWSIDS            | 0 | 9  | 20 | 6-57 | 3 | QSYDSRVRV        | 9  | 24 | + | - | - | + | + | - | - | - | - | + |
|           | donor4-92 | 3-49 | 3-10 | 3 | 4 | 3 | DLMGEGFDY           | 0 | 9  | 10 | 1-47 | 3 | AAWYDLSLGSW      | 11 | 3  | - | - | - | - | - | - | - | - | - | - |



**SUPPLEMENTAL TABLE III.** Targeting and selection of individual mutations in rearranged *IGHV*.

|                   | total sequences                             |        |                                             |                | cloned antibodies                          |        |                                            |        |                      |        |                           |               |                      |        |                           |               |
|-------------------|---------------------------------------------|--------|---------------------------------------------|----------------|--------------------------------------------|--------|--------------------------------------------|--------|----------------------|--------|---------------------------|---------------|----------------------|--------|---------------------------|---------------|
|                   | CD27 <sup>+</sup> IgA <sup>+</sup><br>(126) |        | CD27 <sup>-</sup> IgA <sup>+</sup><br>(109) |                | CD27 <sup>+</sup> IgA <sup>+</sup><br>(88) |        | CD27 <sup>-</sup> IgA <sup>+</sup><br>(75) |        | polyreactive<br>(33) |        | non-polyreactive<br>(130) |               | autoreactive<br>(52) |        | non-autoreactive<br>(111) |               |
| RGYW (%)          | 564.2/2647                                  | (21.3) | <b>339.5/1399</b>                           | <b>(24.3)*</b> | 363.8/1691                                 | (21.5) | 234.2/955                                  | (24.5) | 137.8/611            | (22.6) | 455.5/2039                | (22.3)        | 186.4/851            | (21.9) | 406.9/1799                | (22.6)        |
| WRCY (%)          | 379.1/2647                                  | (14.3) | 191.2/1399                                  | (13.7)         | 235.4/1691                                 | (13.9) | 131.4/955                                  | (13.8) | 82.2/611             | (13.4) | 287.0/2039                | (14.1)        | 125.6/851            | (14.8) | 243.6/1799                | (13.5)        |
| WA (%)            | 355.3/2647                                  | (13.4) | 199.7/1399                                  | (14.3)         | 232.5/1691                                 | (13.7) | 135.4/955                                  | (14.2) | 76.4/611             | (12.5) | 298.8/2039                | (14.7)        | 109.6/851            | (12.9) | 265.7/1799                | (14.8)        |
| TW (%)            | 216.3/2647                                  | (8.2)  | 94.7/1399                                   | (6.8)          | 142.3/1691                                 | (8.4)  | 67.9/955                                   | (7.1)  | 55.6/611             | (9.1)  | 155.7/2039                | (7.6)         | 64.4/851             | (7.6)  | 145.8/1799                | (8.1)         |
| Transitions (%)   | 1339/2647                                   | (50.6) | 744/1399                                    | (53.2)         | 856/1691                                   | (50.6) | 520/955                                    | (54.5) | 329/611              | (53.8) | 1050/2039                 | (51.5)        | 431/851              | (50.6) | 948/1799                  | (52.7)        |
| Transversions (%) | 1308/2647                                   | (49.4) | 655/1399                                    | (46.8)         | 835/1691                                   | (49.4) | 435/955                                    | (45.5) | 282/611              | (46.2) | 989/2039                  | (48.5)        | 420/851              | (49.4) | 851/1799                  | (47.3)        |
| FR R/S (ratio)    | 1109/649                                    | (1.7)  | 585/349                                     | (1.7)          | 684/421                                    | (1.6)  | 390/245                                    | (1.6)  | 227/170              | (1.3)  | <b>845/503</b>            | <b>(1.7)*</b> | 357/215              | (1.7)  | 715/458                   | (1.6)         |
| CDR R/S (ratio)   | 683/206                                     | (3.3)  | 360/103                                     | (3.5)          | 445/141                                    | (3.2)  | 246/72                                     | (3.4)  | 159/55               | (2.9)  | 532/157                   | (3.4)         | 200/77               | (2.6)  | <b>491/135</b>            | <b>(3.6)*</b> |

FR indicates framework region; CDR, complementarity determining region; R/S is the ratio between replacement (R) and silent mutations (S); The number of analyzed sequences is indicated in the brackets next to the population name.

All analyses were performed with the JoinSolver program and the differences between each analyzed population as compared with centrocytes were statistically analyzed with the X<sup>2</sup> test.

Significant differences between CD27<sup>+</sup>IgA<sup>+</sup> and CD27<sup>-</sup>IgA<sup>+</sup> B cells, polyreactive and non-polyreactive B cells and autoreactive and non-autoreactive B cells are depicted in bold. \*, p<0.05
